# Supplementary material for: The denitrosylase SCoR2 controls cardioprotective metabolic reprogramming
Source: eLife. 2025 Nov 17;14:RP106601. doi: 10.7554/eLife.106601 (PMC12622967; doi:10.7554/eLife.106601)
Supplement: Supplementary file 4. [file elife-106601-supp4.xlsx]

## Sheet: Sheet1
Sample internal ID	Collection type (NF explant, NICM (Txp vs LV core) or ICM(F explant))	Sex	Age	Race	EF	Comments	Echo notes
11	NF Explant	M	51	W	n/a	No echo available, no hx of cardiac disease
17	NF Explant	M	53	B	45	Slightly reduced EF but overall normal echo
58	NF Explant	M	42	W	n/a	No echo available, no hx of cardiac disease
59	NF Explant	M	51	W	55	Mild concentric LVH but overall normal echo
79	NF Explant	M	41	W	55	Mild LVH but overall normal echo
84	NF Explant	M	54	B	50	Normal echo
90	NF Explant	M	67	B	60	Mild HTN but no other cardiac symptoms, overall normal echo
99	NF Explant	M	54	B	65	Hx of HTN w/poor med compliance, overall normal fxn on echo
108	NF Explant	M	22	W	n/a	No echo available, no hx of cardiac disease
120	NF Explant	M	59	W	65	HLD controlled by prevacal, normal fxn on echo
123	NF Explant	M	59	W	55	HTN & HLD controlled by meds, normal fxn on echo
125	NF Explant	M	74	W	60	HTN controlled by meds, normal fxn on echo
158	NF Explant	M	62	B	>50	HTN (unsure of meds, no other cardiac disease noted), normal fxn on echo
180	NF Explant	M	59	W	65	Mild coronary artery calcification but normal fxn on echo
1144	Txp	M	63	W		NICM
1054	Txp	M	61	W		NICM
1034	LV core	M	64	W		NICM
974	Txp	M	58	W		NICM
1162	Txp	M	64	B		NICM
1148	Txp	M	50	B		NICM
1112	Txp	M	55	B		NICM
932	Txp	M	60	W		NICM
888	Txp	M	53	B		NICM
878	Txp	M	55	B		NICM
872	Txp	M	63	B		NICM
846	LV core	M	58	B		NICM
824	LV core	M	51	W		NICM
1100	F Explant	M	55	W	20	CAD (multiple hospitalizations), STEMI, familial dyslipidemia, pAfib, IABP prior to txp; severe LV dysfunction w/mild LVH, mild MR & TR	Moderately enlarged LV w/severe dysfxn & mild LVH Normal RV size & systolic fxn Mild MR/TR, trivial PR No valvular stenosis
1111	F Explant	M	55	W	<15	CAD, anterior STEMI s/p 9 DES (x5 LAD, x4 RCA), ICD, chronic angina, DM2, HTN, HLD; severe LV dysfunction w/LVH	Mild enlarged LV w/severe dysfxn Normal RV size & systolic fxn Trivial MR, PR, TR No valvular stenosis
1135	F Explant	M	69	W	<15	LVAD present w/AICD, Chronic systolic CHF, CKD, CAD, DM2, HTN, Afib, hx MI, HLD, VT	Severe LV dysfxn w/mild LVH Normal RV fxn mild AR/TR, trivial MR/PR, prosthetic TV ring present
1143	F Explant	M	69	W	31	CAD s/p CABGx3, VT s/p ablation, Bilateral sympathectomy, ICD in place, refractory VT, Chronic systolic CHF, HTN	Mildly enlarged LV w/ mild LVH Normal RV fxn mild MR/PR LV strain consistent w mechanical dyssynchrony
920	F Explant	M	57	B	<15	CABG, severe native vessel CAD, patent LIMA now s/p PCI of SVG-PDA, PAD, DM2, CKD, HTN, HLD, NSTEMI @ time of admission, IABP placement	Moderately enlarged LV w/severe dysfxn Normal RV size w/moderate systolic dysfxn Mild MR, trivial TR No valvular stenosis No significant changes compared to prior echo
1077	F Explant	M	59	B	13	H/o CABG, Impella, ECMO; DM2; Afib; CKD; LV global dysfunction w/mild LVH, mild RV systolic dysfunction	Mildly enlarged LV w/severe dysfxn & mild LVH Normal LA pressures w/diastolic dysfxn Normal RV size w/mild systolic dysfxn Trivial AR/TR No valvular stenosis Impella device in situ No significant change compared to prior echo
1128	F Explant	M	68	B	17	VT, ICD in place, Afib, HTN, mixed HLD, DM2, CVA following LHC, Sickle cell trait, acute on chronic systolic CHF, Hx of Covid	Severe LV dysfxn elevated LA pressure diastolic dysfxn mild RV systolic dysfxn mild MR/TR, trivial PR
1166	F Explant	M	55	B	25	CAD s/p CABG x3, CKD3, HTN, DM2, HLD, Stent placed 5 days prior, STEMI s/p PCI	Mildly enlarged LV w/grade 1 relaxation abnormality elevated LA pressure diastolic dysfxn mild RV systolic dysfxn trivial MR/TR
